# Supplementary material for: The Impact of Obesity on the Excretion of Steroid Metabolites in Boys and Girls: A Comparison with Normal-Weight Children
Source: MDPI journal article supplement (doi:10.3390/nu15071734), 2023-04-01
Supplement: s1 [file s1]

# Supplementary Materials

**Supplementary Table S1.** List of steroid metabolites ( $\mu\text{g}/24\text{h}$ ): differences between the normal weight and obesity in prepubertal boys

|                                      | Normal weight (n=18) |                           | Obesity (n=16)        |                           | p value |
|--------------------------------------|----------------------|---------------------------|-----------------------|---------------------------|---------|
|                                      | Mean $\pm$ SD        | Median (IQR)              | Mean $\pm$ SD         | Median (IQR)              |         |
| Androsterone                         | 98.43 $\pm$ 77.31    | 80.35 (38.08-125.36)      | 467.63 $\pm$ 417.04   | 265.81 (172.85-631.27)    | <0.001  |
| Etiocholanolone                      | 69.51 $\pm$ 51.76    | 54.62 (27.48-98.83)       | 233.07 $\pm$ 175.46   | 141.01 (104.03-342.32)    | <0.001  |
| Dihydroandrosterone                  | 19.20 $\pm$ 15.61    | 15.39 (6.89-25.29)        | 23.77 $\pm$ 35.73     | 10.34 (7.20-25.42)        | 0.798   |
| Dehydroepiandrosterone               | 105.39 $\pm$ 74.41   | 108.30 (50.62-141.13)     | 113.24 $\pm$ 168.37   | 42.93 (23.04-107.71)      | 0.330   |
| Androstenediol                       | 5.38 $\pm$ 3.91      | 5.18 (2.27-7.60)          | 23.38 $\pm$ 24.53     | 12.96 (5.27-35.04)        | 0.005   |
| 11-oxo-etiocholanolone               | 283.59 $\pm$ 121.12  | 301.12 (196.48-348.76)    | 421.38 $\pm$ 371.97   | 334.77 (105.59-618.21)    | 0.605   |
| 5 $\alpha$ -dihydrotestosterone      | 5.41 $\pm$ 3.30      | 4.23 (2.97-7.57)          | 20.16 $\pm$ 27.50     | 14.36 (7.38-16.82)        | 0.005   |
| 17 $\beta$ -estradiol                | 0.72 $\pm$ 0.75      | 0.40 (0.10-1.08)          | 1.16 $\pm$ 0.95       | 0.99 (0.25-1.85)          | 0.198   |
| Testosterone                         | 6.78 $\pm$ 2.25      | 6.24 (5.96-7.70)          | 13.06 $\pm$ 11.14     | 9.37 (6.53-16.08)         | 0.036   |
| 11 $\beta$ -hydroxyandrosterone      | 259.65 $\pm$ 112.38  | 237.94 (214.01-362.14)    | 540.32 $\pm$ 338.59   | 426.35 (293.36-785.37)    | 0.005   |
| 11 $\beta$ -hydroxyetiocholanolone   | 125.69 $\pm$ 89.06   | 113.73 (55.12-189.91)     | 257.54 $\pm$ 289.73   | 128.04 (40.18-298.50)     | 0.486   |
| 17-hydroxypregnanolone               | 3.97 $\pm$ 2.73      | 3.27 (2.40-4.55)          | 12.88 $\pm$ 10.15     | 8.02 (6.59-17.01)         | <0.001  |
| 16 $\alpha$ -hydroxy-DHEA            | 67.63 $\pm$ 58.63    | 55.27 (28.85-66.79)       | 300.24 $\pm$ 385.15   | 99.49 (38.70-394.22)      | 0.081   |
| Pregnanediol                         | 32.45 $\pm$ 29.16    | 21.77 (13.48-44.23)       | 191.79 $\pm$ 279.53   | 128.60 (44.97-184.13)     | 0.001   |
| Pregnanetriol                        | 87.28 $\pm$ 41.66    | 85.71 (50.65-120.93)      | 217.07 $\pm$ 133.06   | 170.91 (122.03-310.90)    | <0.001  |
| Androstenetriol                      | 31.30 $\pm$ 27.14    | 23.46 (6.62-50.60)        | 56.43 $\pm$ 58.95     | 29.93 (11.34-95.86)       | 0.330   |
| Tetrahydro-11-deoxycortisol          | 49.47 $\pm$ 33.96    | 41.48 (23.95-63.78)       | 65.96 $\pm$ 52.51     | 58.03 (25.88-80.33)       | 0.486   |
| Tetrahydrodeoxycorticosterone        | 3.44 $\pm$ 2.26      | 3.20 (2.35-3.72)          | 6.93 $\pm$ 3.90       | 6.30 (3.37-9.30)          | 0.003   |
| Estriol                              | 0.48 $\pm$ 0.36      | 0.35 (0.25-0.58)          | 0.69 $\pm$ 0.51       | 0.73 (0.29-0.99)          | 0.313   |
| Pregnanetriolone                     | 6.59 $\pm$ 3.40      | 5.69 (4.55-7.77)          | 16.48 $\pm$ 9.57      | 12.98 (9.90-21.67)        | <0.001  |
| Pregnenetriol                        | 4.24 $\pm$ 5.99      | 2.39 (1.07-4.20)          | 11.65 $\pm$ 8.90      | 7.86 (5.38-15.51)         | <0.001  |
| Tetrahydrocortisone                  | 1675.81 $\pm$ 877.13 | 1375.59 (1193.58-1812.31) | 2722.70 $\pm$ 2076.95 | 2253.85 (1152.19-3246.49) | 0.313   |
| Tetrahydro-11-dehydrocorticosterone  | 95.62 $\pm$ 68.15    | 65.80 (53.16-112.66)      | 199.99 $\pm$ 150.59   | 117.24 (81.34-310.30)     | 0.007   |
| Tetrahydrocorticosterone             | 51.04 $\pm$ 29.68    | 40.93 (36.46-47.86)       | 140.22 $\pm$ 78.21    | 132.25 (76.70-216.79)     | <0.001  |
| 5 $\alpha$ -tetrahydrocorticosterone | 210.36 $\pm$ 186.16  | 150.55 (128.22-209.06)    | 422.76 $\pm$ 285.85   | 334.91 (165.55-709.64)    | 0.033   |
| Tetrahydrocortisol                   | 498.63 $\pm$ 244.28  | 429.82 (345.60-532.27)    | 730.60 $\pm$ 509.15   | 568.47 (303.59-858.47)    | 0.251   |
| 5 $\alpha$ -tetrahydrocortisol       | 700.12 $\pm$ 541.02  | 531.19 (454.98-691.01)    | 1152.20 $\pm$ 837.95  | 1049.48 (576.78-1450.30)  | 0.022   |
| $\alpha$ -cortolone                  | 499.77 $\pm$ 286.43  | 444.14 (337.37-544.27)    | 1195.25 $\pm$ 906.94  | 912.12 (447.11-1538.73)   | 0.009   |
| $\beta$ -cortolone                   | 283.01 $\pm$ 103.51  | 267.97 (226.85-349.42)    | 439.39 $\pm$ 287.90   | 377.95 (188.81-598.75)    | 0.251   |
| $\alpha$ -cortol                     | 105.68 $\pm$ 48.13   | 85.76 (79.88-121.62)      | 188.82 $\pm$ 131.35   | 148.37 (97.80-261.41)     | 0.075   |
| $\beta$ -cortol                      | 222.29 $\pm$ 108.93  | 220.39 (164.25-260.35)    | 301.14 $\pm$ 207.40   | 232.52 (154.51-400.88)    | 0.463   |
| Cortisone                            | 81.61 $\pm$ 32.05    | 77.23 (61.66-90.59)       | 104.85 $\pm$ 77.37    | 69.76 (46.65-163.92)      | 1.000   |
| Cortisol                             | 83.36 $\pm$ 32.05    | 75.73 (62.52-87.88)       | 96.10 $\pm$ 56.99     | 74.79 (55.95-123.86)      | 0.878   |
| 20 $\alpha$ -dihydrocortisone        | 13.42 $\pm$ 6.25     | 11.29 (9.92-17.13)        | 15.03 $\pm$ 9.85      | 11.54 (7.97-17.82)        | 0.905   |
| 20 $\beta$ -dihydrocortisone         | 28.22 $\pm$ 14.01    | 23.50 (19.83-32.59)       | 68.37 $\pm$ 54.91     | 47.37 (30.17-88.74)       | 0.010   |
| 20 $\alpha$ -dihydrocortisol         | 23.23 $\pm$ 17.85    | 16.10 (12.20-28.03)       | 41.85 $\pm$ 37.37     | 31.00 (10.97-65.83)       | 0.422   |
| 20 $\beta$ -dihydrocortisol          | 126.52 $\pm$ 96.80   | 96.26 (43.75-165.23)      | 76.46 $\pm$ 34.90     | 62.52 (58.42-88.80)       | 0.442   |
| 6 $\beta$ -hydroxycortisol           | 33.41 $\pm$ 13.43    | 31.54 (22.33-43.80)       | 38.18 $\pm$ 27.33     | 33.48 (15.52-48.13)       | 0.986   |

**Supplementary Table S2.** List of steroid metabolites (µg/24h): differences between the normal weight and obesity in boys with advanced puberty

|                                     | Normal weight (n = 12) |                           | Obesity (n = 28)  |                           | p value |
|-------------------------------------|------------------------|---------------------------|-------------------|---------------------------|---------|
|                                     | Mean±SD                | Median (IQR)              | Mean±SD           | Median (IQR)              |         |
| Androsterone                        | 2385.34 ± 1602.63      | 1953.79 (1531.54-2593.81) | 1968.90 ± 1426.66 | 1477.15 (986.05-2717.29)  | 0.328   |
| Etiocholanolone                     | 1245.88 ± 858.90       | 1011.44 (626.36-1740.87)  | 955.41 ± 715.79   | 587.26 (424.83-1184.96)   | 0.202   |
| Dihydroandrosterone                 | 78.34 ± 46.93          | 67.53 (45.68-91.10)       | 67.20 ± 50.71     | 56.60 (34.74-80.52)       | 0.358   |
| Dehydroepiandrosterone              | 786.77 ± 736.39        | 521.20 (273.67-971.03)    | 324.77 ± 558.52   | 86.32 (49.71-421.15)      | 0.010   |
| Androstenediol                      | 55.23 ± 47.61          | 41.53 (22.51-54.05)       | 58.71 ± 73.89     | 43.05 (20.82-63.30)       | 0.919   |
| 11-oxo-etiocholanolone              | 697.89 ± 303.35        | 712.95 (481.06-844.82)    | 590.36 ± 468.85   | 565.74 (253.11-759.14)    | 0.202   |
| 5α-dihydrotestosterone              | 24.61 ± 11.95          | 26.44 (16.07-32.87)       | 20.83 ± 14.91     | 15.31 (8.92-35.70)        | 0.389   |
| 17β-estradiol                       | 1.33 ± 1.55            | 0.75 (0.43-1.08)          | 1.40 ± 1.44       | 0.94 (0.48-1.63)          | 0.610   |
| Testosterone                        | 57.35 ± 36.44          | 52.41 (23.70-71.40)       | 48.55 ± 40.84     | 38.31 (27.40-58.12)       | 0.475   |
| 11β-hydroxyandrosterone             | 1232.31 ± 646.76       | 1171.65 (723.71-1529.15)  | 1217.40 ± 681.94  | 1139.65 (640.52-1594.88)  | 0.942   |
| 11β-hydroxyetiocholanolone          | 315.69 ± 211.25        | 266.88 (160.04-444.04)    | 332.76 ± 300.69   | 256.86 (115.30-459.12)    | 0.850   |
| 17-hydroxypregnanolone              | 33.81 ± 30.38          | 18.65 (13.97-47.37)       | 24.40 ± 17.36     | 21.93 (11.43-29.79)       | 0.610   |
| 16α-hydroxy-DHEA                    | 441.16 ± 210.11        | 381.91 (293.39-561.04)    | 370.53 ± 275.32   | 271.84 (150.79-641.50)    | 0.224   |
| Pregnanediol                        | 155.30 ± 143.97        | 114.80 (55.22-165.41)     | 232.12 ± 194.19   | 189.44 (82.23-276.15)     | 0.122   |
| Pregnanetriol                       | 589.28 ± 352.02        | 559.52 (281.61-919.63)    | 507.04 ± 295.34   | 393.98 (274.58-696.93)    | 0.760   |
| Androstenetriol                     | 361.75 ± 236.84        | 267.99 (207.19-461.82)    | 312.57 ± 243.53   | 239.67 (140.75-395.14)    | 0.512   |
| Tetrahydro-11-deoxycortisol         | 63.82 ± 44.94          | 42.92 (39.95-77.30)       | 62.68 ± 49.50     | 55.21 (21.93-94.17)       | 0.850   |
| Tetrahydrodeoxycorticosterone       | 7.29 ± 6.37            | 4.98 (3.07-8.40)          | 7.81 ± 8.40       | 5.25 (3.25-8.67)          | 0.805   |
| Estriol                             | 3.12 ± 3.82            | 1.89 (0.76-3.05)          | 2.69 ± 2.24       | 1.72 (1.28-3.38)          | 0.782   |
| Pregnanetriolone                    | 17.58 ± 10.82          | 15.91 (9.43-23.30)        | 14.05 ± 7.58      | 11.06 (7.80-21.77)        | 0.493   |
| Pregnenetriol                       | 97.81 ± 178.07         | 28.84 (21.80-68.30)       | 74.89 ± 143.71    | 33.08 (13.04-82.17)       | 0.805   |
| Tetrahydrocortisone                 | 2945.23 ± 1227.57      | 2475.24 (2048.97-3508.52) | 3553.55 ± 2069.90 | 3309.55 (1849.42-4618.60) | 0.457   |
| Tetrahydro-11-dehydrocorticosterone | 150.24 ± 105.70        | 128.47 (86.49-155.73)     | 225.46 ± 120.38   | 219.98 (147.50-285.70)    | 0.021   |
| Tetrahydrocorticosterone            | 111.74 ± 78.87         | 88.60 (55.55-145.35)      | 263.49 ± 308.70   | 171.15 (130.89-218.91)    | 0.007   |
| 5α-tetrahydrocorticosterone         | 506.93 ± 365.63        | 372.36 (248.61-644.59)    | 523.05 ± 322.54   | 422.25 (322.42-679.77)    | 0.570   |
| Tetrahydrocortisol                  | 1023.23 ± 509.55       | 806.60 (644.98-1413.56)   | 1259.60 ± 732.54  | 1090.40 (783.90-1613.18)  | 0.389   |
| 5α-tetrahydrocortisol               | 1890.18 ± 974.22       | 1667.86 (1081.87-2481.29) | 1828.22 ± 1342.45 | 1169.83 (910.61-2463.39)  | 0.550   |
| α-cortolone                         | 1385.42 ± 589.98       | 1418.05 (1031.91-1485.55) | 1939.85 ± 958.08  | 1920.14 (1136.76-2691.38) | 0.108   |
| β-cortolone                         | 455.92 ± 162.60        | 426.26 (306.91-544.40)    | 562.83 ± 298.18   | 517.45 (329.28-698.16)    | 0.389   |
| α-cortol                            | 295.59 ± 110.13        | 267.53 (197.42-385.50)    | 366.15 ± 202.33   | 326.41 (198.40-485.90)    | 0.439   |
| β-cortol                            | 396.95 ± 158.67        | 346.97 (284.75-519.40)    | 507.68 ± 247.69   | 444.34 (304.95-690.83)    | 0.260   |
| Cortisone                           | 161.39 ± 68.35         | 160.62 (94.94-204.73)     | 138.02 ± 76.14    | 127.17 (86.74-159.49)     | 0.182   |
| Cortisol                            | 171.26 ± 80.21         | 144.39 (111.04-236.02)    | 150.62 ± 82.92    | 133.94 (95.13-169.10)     | 0.439   |
| 20α-dihydrocortisone                | 31.40 ± 8.99           | 32.56 (25.03-35.42)       | 20.83 ± 9.41      | 18.64 (13.57-26.51)       | <0.001  |
| 20β-dihydrocortisone                | 81.37 ± 32.81          | 82.00 (56.88-94.91)       | 96.69 ± 46.91     | 87.13 (61.93-118.11)      | 0.273   |
| 20α-dihydrocortisol                 | 45.34 ± 24.50          | 40.58 (29.55-56.03)       | 82.24 ± 59.02     | 73.33 (46.20-95.88)       | 0.056   |
| 20β-dihydrocortisol                 | 239.06 ± 215.31        | 153.58 (106.30-271.14)    | 116.42 ± 92.01    | 79.80 (70.89-138.73)      | 0.033   |
| 6β-hydroxycortisol                  | 49.62 ± 20.01          | 45.56 (34.14-66.90)       | 49.10 ± 39.96     | 37.56 (25.15-57.61)       | 0.405   |

**Supplementary Table S3.** List of steroid metabolites ( $\mu\text{g}/24\text{h}$ ): differences between the normal weight and obesity in prepubertal girls

|                                      | Normal weight (n=6)  |                           | Obesity (n=18)        |                           | <i>p</i> value |
|--------------------------------------|----------------------|---------------------------|-----------------------|---------------------------|----------------|
|                                      | Mean $\pm$ SD        | Median (IQR)              | Mean $\pm$ SD         | Median (IQR)              |                |
| Androsterone                         | 174.85 $\pm$ 136.71  | 120.31 (93.88-207.23)     | 559.06 $\pm$ 805.96   | 254.92 (158.10-440.15)    | 0.056          |
| Etiocholanolone                      | 74.98 $\pm$ 36.52    | 88.00 (42.75-104.48)      | 338.83 $\pm$ 567.60   | 119.75 (77.84-428.66)     | 0.177          |
| Dihydroandrosterone                  | 11.18 $\pm$ 8.01     | 8.04 (5.12-17.91)         | 27.99 $\pm$ 41.32     | 13.35 (9.70-20.35)        | 0.224          |
| Dehydroepiandrosterone               | 54.31 $\pm$ 83.46    | 16.80 (8.34-38.92)        | 60.04 $\pm$ 55.59     | 35.87 (14.89-92.08)       | 0.310          |
| Androstenediol                       | 3.60 $\pm$ 1.24      | 3.72 (2.81-4.53)          | 18.15 $\pm$ 14.28     | 13.10 (8.17-24.34)        | <0.001         |
| 11-oxo-etiocholanolone               | 192.52 $\pm$ 101.31  | 172.92 (140.22-201.07)    | 374.70 $\pm$ 182.12   | 340.02 (204.99-562.07)    | 0.027          |
| 5 $\alpha$ -dihydrotestosterone      | 4.94 $\pm$ 3.03      | 4.60 (2.58-7.88)          | 5.73 $\pm$ 5.65       | 3.62 (2.46-6.53)          | 0.820          |
| 17 $\beta$ -estradiol                | 0.63 $\pm$ 0.48      | 0.55 (0.22-0.93)          | 0.69 $\pm$ 0.76       | 0.38 (0.13-0.92)          | 0.820          |
| Testosterone                         | 6.03 $\pm$ 1.09      | 6.60 (5.27-6.88)          | 10.27 $\pm$ 8.77      | 6.86 (4.76-12.80)         | 0.494          |
| 11 $\beta$ -hydroxyandrosterone      | 237.88 $\pm$ 78.82   | 248.68 (193.35-297.23)    | 464.53 $\pm$ 354.67   | 294.97 (269.92-496.48)    | 0.119          |
| 11 $\beta$ -hydroxyetiocholanolone   | 100.49 $\pm$ 67.34   | 80.30 (45.20-165.88)      | 156.59 $\pm$ 118.31   | 134.81 (69.14-183.44)     | 0.378          |
| 17-hydroxypregnanolone               | 4.89 $\pm$ 3.25      | 4.69 (2.03-7.69)          | 8.34 $\pm$ 5.85       | 6.20 (4.94-8.78)          | 0.310          |
| 16 $\alpha$ -hydroxy-DHEA            | 26.02 $\pm$ 17.52    | 22.80 (10.26-37.18)       | 143.12 $\pm$ 167.63   | 87.83 (40.18-177.55)      | 0.007          |
| Pregnanediol                         | 45.19 $\pm$ 25.73    | 46.93 (24.93-56.67)       | 179.83 $\pm$ 315.11   | 59.23 (25.61-153.88)      | 0.310          |
| Pregnanetriol                        | 118.46 $\pm$ 47.75   | 122.10 (91.38-160.29)     | 231.50 $\pm$ 155.55   | 154.70 (120.76-288.10)    | 0.077          |
| Androstenetriol                      | 18.39 $\pm$ 14.85    | 12.18 (7.77-27.92)        | 87.73 $\pm$ 158.25    | 50.48 (21.96-72.81)       | 0.007          |
| Tetrahydro-11-deoxycortisol          | 48.00 $\pm$ 21.60    | 41.19 (33.30-62.20)       | 62.94 $\pm$ 37.89     | 58.51 (41.77-80.33)       | 0.415          |
| Tetrahydrodeoxycorticosterone        | 3.95 $\pm$ 2.09      | 2.98 (2.71-4.58)          | 5.05 $\pm$ 4.29       | 3.77 (2.41-5.96)          | 0.770          |
| Estriol                              | 0.46 $\pm$ 0.38      | 0.30 (0.19-0.58)          | 1.50 $\pm$ 3.21       | 0.66 (0.31-0.87)          | 0.280          |
| Pregnanetriolone                     | 5.06 $\pm$ 2.12      | 4.61 (3.60-6.10)          | 11.89 $\pm$ 6.40      | 11.31 (7.10-13.58)        | 0.004          |
| Pregnenetriol                        | 2.21 $\pm$ 2.25      | 0.99 (0.94-2.32)          | 5.23 $\pm$ 4.11       | 3.84 (2.04-7.92)          | 0.040          |
| Tetrahydrocortisone                  | 1400.46 $\pm$ 528.56 | 1095.99 (1004.73-1782.82) | 2430.33 $\pm$ 1348.91 | 2127.69 (1533.62-3063.53) | 0.119          |
| Tetrahydro-11-dehydrocorticosterone  | 81.35 $\pm$ 38.35    | 62.86 (56.25-112.84)      | 152.03 $\pm$ 86.77    | 127.35 (92.02-226.42)     | 0.119          |
| Tetrahydrocorticosterone             | 55.45 $\pm$ 27.72    | 51.86 (32.04-75.67)       | 102.93 $\pm$ 88.36    | 74.10 (46.23-144.00)      | 0.251          |
| 5 $\alpha$ -tetrahydrocorticosterone | 251.21 $\pm$ 148.21  | 171.19 (135.52-352.32)    | 320.94 $\pm$ 184.71   | 259.68 (193.91-411.47)    | 0.392          |
| Tetrahydrocortisol                   | 381.42 $\pm$ 135.12  | 375.43 (267.10-459.76)    | 728.96 $\pm$ 640.79   | 524.12 (314.00-842.95)    | 0.156          |
| 5 $\alpha$ -tetrahydrocortisol       | 660.27 $\pm$ 208.89  | 718.48 (464.54-820.75)    | 1059.30 $\pm$ 524.39  | 943.37 (575.19-1456.55)   | 0.119          |
| $\alpha$ -cortolone                  | 606.22 $\pm$ 326.37  | 433.01 (346.67-894.30)    | 985.07 $\pm$ 433.43   | 819.46 (686.16-1345.50)   | 0.056          |
| $\beta$ -cortolone                   | 239.72 $\pm$ 77.17   | 222.09 (174.57-297.33)    | 355.89 $\pm$ 185.70   | 303.69 (243.18-409.55)    | 0.199          |
| $\alpha$ -cortol                     | 118.60 $\pm$ 47.19   | 106.16 (86.97-140.02)     | 161.03 $\pm$ 82.74    | 135.87 (104.74-235.40)    | 0.280          |
| $\beta$ -cortol                      | 173.06 $\pm$ 49.52   | 160.42 (154.92-206.40)    | 368.15 $\pm$ 312.78   | 181.64 (145.53-538.56)    | 0.224          |
| Cortisone                            | 76.06 $\pm$ 31.32    | 73.18 (46.14-106.03)      | 86.36 $\pm$ 50.47     | 70.90 (56.89-92.58)       | 0.820          |
| Cortisol                             | 85.94 $\pm$ 41.13    | 79.00 (56.38-107.89)      | 83.66 $\pm$ 43.94     | 65.58 (49.25-109.48)      | 0.820          |
| 20 $\alpha$ -dihydrocortisone        | 13.37 $\pm$ 6.49     | 11.65 (7.56-18.35)        | 11.10 $\pm$ 5.41      | 10.45 (6.69-14.50)        | 0.626          |
| 20 $\beta$ -dihydrocortisone         | 34.68 $\pm$ 19.03    | 30.47 (18.28-43.73)       | 48.40 $\pm$ 25.73     | 43.63 (30.16-65.14)       | 0.415          |
| 20 $\alpha$ -dihydrocortisol         | 29.11 $\pm$ 21.20    | 23.31 (11.75-39.65)       | 43.80 $\pm$ 43.70     | 29.75 (16.12-52.89)       | 0.673          |
| 20 $\beta$ -dihydrocortisol          | 180.24 $\pm$ 142.27  | 158.42 (97.97-195.69)     | 56.64 $\pm$ 26.48     | 53.77 (38.26-70.88)       | 0.033          |
| 6 $\beta$ -hydroxycortisol           | 30.80 $\pm$ 12.02    | 31.11 (19.20-40.97)       | 33.86 $\pm$ 34.35     | 18.43 (14.44-33.95)       | 0.378          |

**Supplementary Table S4.** List of steroid metabolites ( $\mu\text{g}/24\text{h}$ ): differences between the normal weight and obesity in girls with advanced puberty.

|                                      | Normal weight (n = 15) |                           | Obesity (n = 40)      |                           | p value |
|--------------------------------------|------------------------|---------------------------|-----------------------|---------------------------|---------|
|                                      | Mean $\pm$ SD          | Median (IQR)              | Mean $\pm$ SD         | Median (IQR)              |         |
| Androsterone                         | 1855.48 $\pm$ 1183.85  | 1831.69 (999.00-2100.43)  | 1970.30 $\pm$ 1732.32 | 1374.73 (1043.89-2252.31) | 0.874   |
| Etiocolanolone                       | 1347.82 $\pm$ 1076.99  | 719.82 (558.32-1965.09)   | 1116.51 $\pm$ 795.40  | 940.08 (616.55-1221.95)   | 0.786   |
| Dihydroandrosterone                  | 35.37 $\pm$ 24.83      | 28.15 (20.82-43.78)       | 52.90 $\pm$ 46.06     | 39.02 (22.43-62.25)       | 0.204   |
| Dehydroepiandrosterone               | 194.52 $\pm$ 273.92    | 36.55 (22.98-268.66)      | 485.75 $\pm$ 1272.88  | 64.94 (31.93-270.22)      | 0.248   |
| Androstenediol                       | 37.57 $\pm$ 19.99      | 31.58 (23.42-55.69)       | 112.84 $\pm$ 257.65   | 50.26 (24.67-86.16)       | 0.155   |
| 11-oxo-etiocholanolone               | 657.19 $\pm$ 578.88    | 461.27 (278.30-740.38)    | 432.58 $\pm$ 294.00   | 315.47 (211.39-657.45)    | 0.233   |
| 5 $\alpha$ -dihydrotestosterone      | 17.23 $\pm$ 16.26      | 15.13 (7.41-20.31)        | 1699 $\pm$ 11.89      | 14.41 (6.70-23.66)        | 0.772   |
| 17 $\beta$ -estradiol                | 1.98 $\pm$ 1.48        | 1.29 (0.99-2.12)          | 2.20 $\pm$ 1.51       | 1.78 (1.07-3.16)          | 0.594   |
| Testosterone                         | 22.38 $\pm$ 18.24      | 17.80 (11.27-26.78)       | 26.49 $\pm$ 30.85     | 17.12 (11.22-28.22)       | 0.948   |
| 11 $\beta$ -hydroxyandrosterone      | 1340.76 $\pm$ 906.05   | 1230.72 (845.54-1539.83)  | 1227.75 $\pm$ 1153.84 | 878.21 (678.43-1366.89)   | 0.280   |
| 11 $\beta$ -hydroxyetiocholanolone   | 437.43 $\pm$ 647.75    | 183.72 (66.22-532.20)     | 297.90 $\pm$ 271.35   | 213.27 (105.07-428.82)    | 0.758   |
| 17-hydroxypregnanolone               | 23.76 $\pm$ 18.58      | 17.77 (11.54-32.73)       | 31.31 $\pm$ 33.63     | 17.30 (11.98-36.15)       | 0.715   |
| 16 $\alpha$ -hydroxy-DHEA            | 330.74 $\pm$ 278.34    | 239.16 (110.22-441.75)    | 492.77 $\pm$ 541.93   | 310.61 (129.42-655.75)    | 0.394   |
| Pregnanediol                         | 305.23 $\pm$ 242.07    | 283.18 (118.26-378.62)    | 410.96 $\pm$ 385.88   | 263.69 (118.27-590.21)    | 0.531   |
| Pregnanetriol                        | 646.79 $\pm$ 459.42    | 522.58 (309.92-839.83)    | 647.75 $\pm$ 448.90   | 536.43 (372.78-804.78)    | 0.859   |
| Androstenetriol                      | 278.36 $\pm$ 164.39    | 244.31 (169.67-365.42)    | 389.03 $\pm$ 394.39   | 264.62 (133.49-497.42)    | 0.715   |
| Tetrahydro-11-deoxycortisol          | 74.57 $\pm$ 32.87      | 69.26 (46.15-97.60)       | 65.32 $\pm$ 49.56     | 50.48 (35.28-82.57)       | 0.161   |
| Tetrahydrodeoxycorticosterone        | 7.77 $\pm$ 4.87        | 7.43 (3.33-11.68)         | 7.93 $\pm$ 6.88       | 4.76 (3.34-9.24)          | 0.801   |
| Estriol                              | 5.58 $\pm$ 4.14        | 4.62 (2.66-7.39)          | 9.87 $\pm$ 10.78      | 5.33 (2.85-12.97)         | 0.415   |
| Pregnanetriolone                     | 16.25 $\pm$ 12.20      | 12.58 (8.28-20.78)        | 14.64 $\pm$ 14.92     | 9.66 (6.53-14.23)         | 0.298   |
| Pregnenetriol                        | 32.69 $\pm$ 43.78      | 14.71 (6.28-31.15)        | 183.98 $\pm$ 400.41   | 33.68 (16.58-162.44)      | 0.045   |
| Tetrahydrocortisone                  | 3151.05 $\pm$ 1042.78  | 3278.60 (2244.49-3738.04) | 3059.06 $\pm$ 2157.01 | 2502.48 (1758.73-3782.87) | 0.325   |
| Tetrahydro-11-dehydrocorticosterone  | 155.36 $\pm$ 90.49     | 120.51 (90.37-219.57)     | 152.30 $\pm$ 109.34   | 133.60 (69.73-184.73)     | 0.874   |
| Tetrahydrocorticosterone             | 105.95 $\pm$ 56.94     | 100.34 (57.42-127.91)     | 145.57 $\pm$ 129.56   | 98.54 (72.33-153.44)      | 0.531   |
| 5 $\alpha$ -tetrahydrocorticosterone | 346.19 $\pm$ 111.17    | 328.53 (247.47-426.39)    | 384.70 $\pm$ 301.72   | 346.85 (176.26-462.38)    | 0.568   |
| Tetrahydrocortisol                   | 1132.53 $\pm$ 499.81   | 1101.57 (716.61-1388.38)  | 1428.86 $\pm$ 1372.95 | 1147.31 (735.09-1704.99)  | 0.660   |
| 5 $\alpha$ -tetrahydrocortisol       | 1281.04 $\pm$ 489.55   | 1054.00 (937.81-1687.02)  | 1783.34 $\pm$ 1591.22 | 1353.33 (899.26-2039.96)  | 0.460   |
| $\alpha$ -cortolone                  | 1816.33 $\pm$ 944.00   | 1551.04 (1171.45-2324.15) | 1512.81 $\pm$ 904.17  | 1281.58 (886.97-1972.49)  | 0.226   |
| $\beta$ -cortolone                   | 619.88 $\pm$ 263.36    | 530.65 (417.21-803.06)    | 471.40 $\pm$ 282.66   | 440.44 (277.20-563.86)    | 0.041   |
| $\alpha$ -cortol                     | 306.05 $\pm$ 155.54    | 287.77 (197.85-376.05)    | 407.72 $\pm$ 452.84   | 288.02 (178.13-445.30)    | 0.786   |
| $\beta$ -cortol                      | 515.55 $\pm$ 293.11    | 399.39 (289.54-703.57)    | 482.70 $\pm$ 396.98   | 391.37 (269.72-508.36)    | 0.518   |
| Cortisone                            | 134.79 $\pm$ 38.84     | 122.85 (106.24-174.40)    | 123.04 $\pm$ 76.05    | 106.63 (68.17-157.36)     | 0.134   |
| Cortisol                             | 150.55 $\pm$ 51.22     | 138.12 (110.07-165.87)    | 143.19 $\pm$ 95.49    | 127.30 (78.18-167.21)     | 0.233   |
| 20 $\alpha$ -dihydrocortisone        | 22.23 $\pm$ 8.01       | 21.76 (14.04-28.83)       | 17.46 $\pm$ 12.23     | 13.65 (10.54-23.89)       | 0.014   |
| 20 $\beta$ -dihydrocortisone         | 70.59 $\pm$ 31.13      | 64.92 (41.76-101.77)      | 83.25 $\pm$ 68.08     | 62.65 (46.17-102.37)      | 0.903   |
| 20 $\alpha$ -dihydrocortisol         | 52.58 $\pm$ 35.57      | 38.46 (29.04-62.95)       | 88.59 $\pm$ 154.17    | 40.41 (25.39-62.72)       | 0.903   |
| 20 $\beta$ -dihydrocortisol          | 252.33 $\pm$ 209.11    | 223.02 (111.69-300.32)    | 110.03 $\pm$ 81.43    | 82.34 (61.37-119.73)      | 0.004   |
| 6 $\beta$ -hydroxycortisol           | 50.17 $\pm$ 27.93      | 40.35 (28.46-76.89)       | 44.40 $\pm$ 38.78     | 34.40 (20.68-49.01)       | 0.344   |

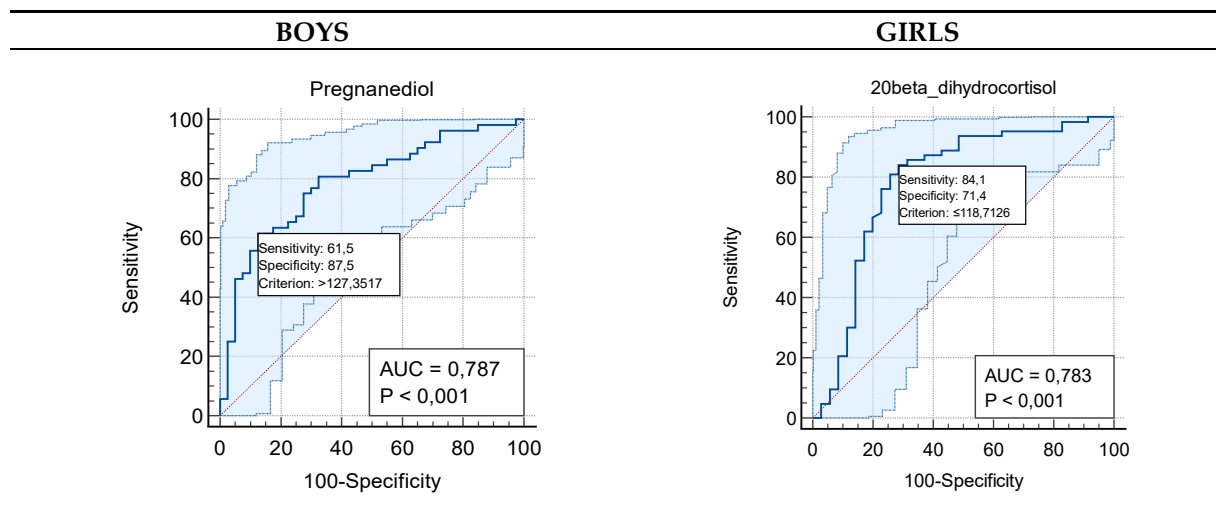

A

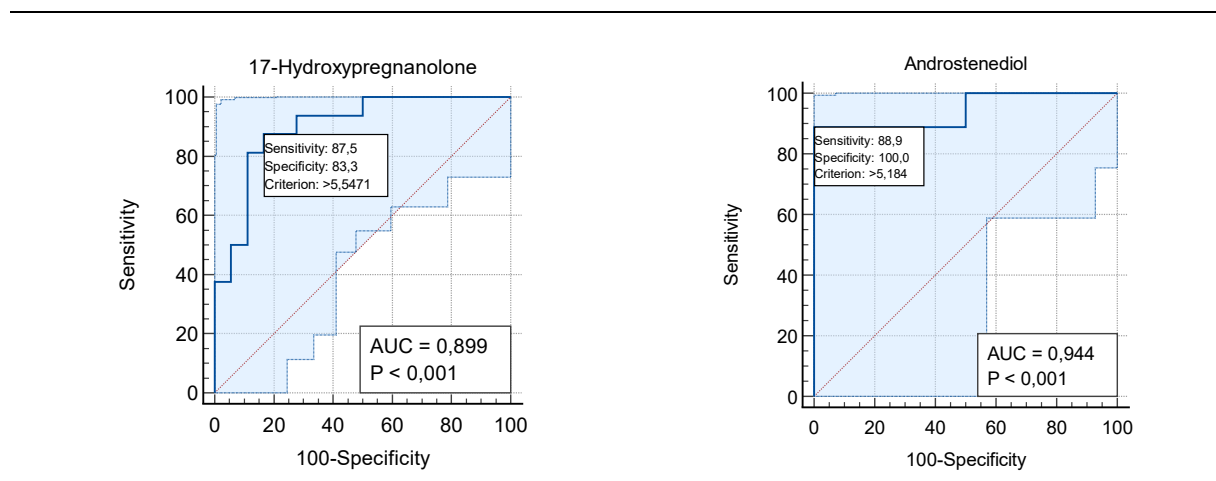

B

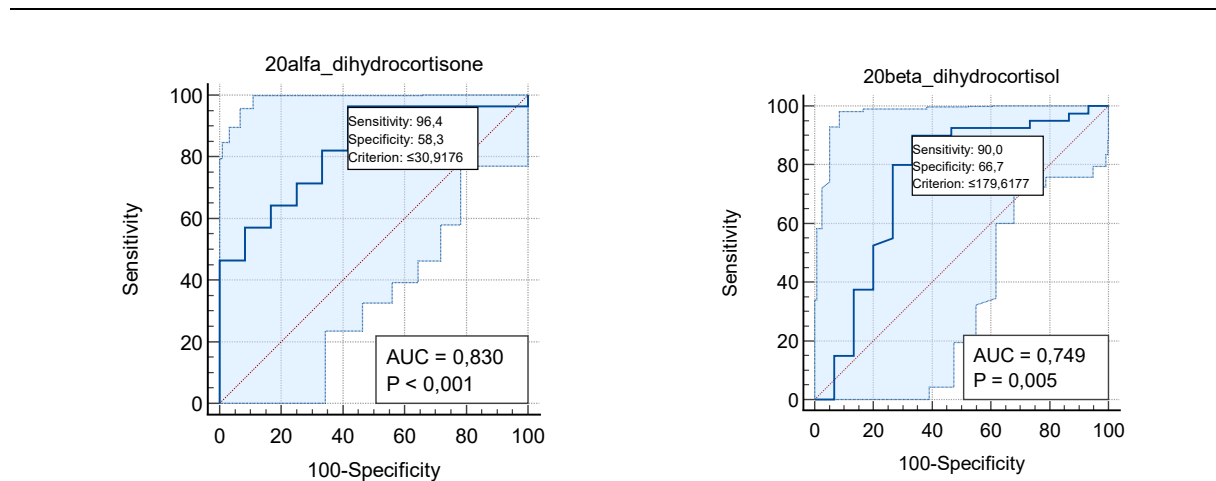

C

**Supplementary Figure S1. Results of the analysis of the ROC curve for most appropriate classifier to distinguish alterations in steroid metabolites between normal weight and obesity.** The blue shaped area is the 95% confidence interval of the sensitivity at the given specificity. A – whole group divided by sex, B – prepubertal group divided by sex, C – group with advanced puberty divided by sex.
